# Supplementary material for: One-step synthesis of high-quality homogenous Te/Se alloy nanorods with various morphologies
Source: Royal Society of Chemistry journal article supplement (doi:10.1039/c4ce02352h), 2015-01-01
Supplement: c4ce02352h4.pdf [file c4ce02352h4.pdf]

## Supporting Information

# One-Step Synthesis of High-Quality Homogenous Te/Se Alloy Nanorods with Various Morphologies

*Shilin Fu,<sup>a</sup> Kai Cai,<sup>a</sup> Long Wu<sup>a</sup> and Heyou Han<sup>a,\*</sup>*

State Key Laboratory of Agricultural Microbiology, College of Science.

Huazhong Agricultural University, Wuhan 430070, P.R. China.

\*To whom correspondence should be addressed: [hyhan@mail.hzau.edu.cn](mailto:hyhan@mail.hzau.edu.cn).

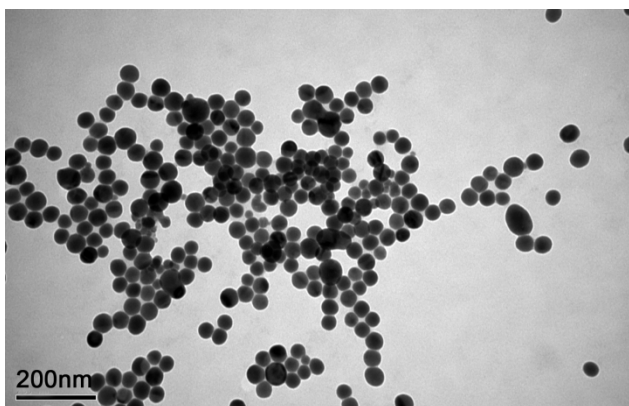

**Fig. S1** Reaction conditions for a-Te/Se alloys were  $x(\text{Te}:\text{Se})=1:10$  and growth time of 10 min.

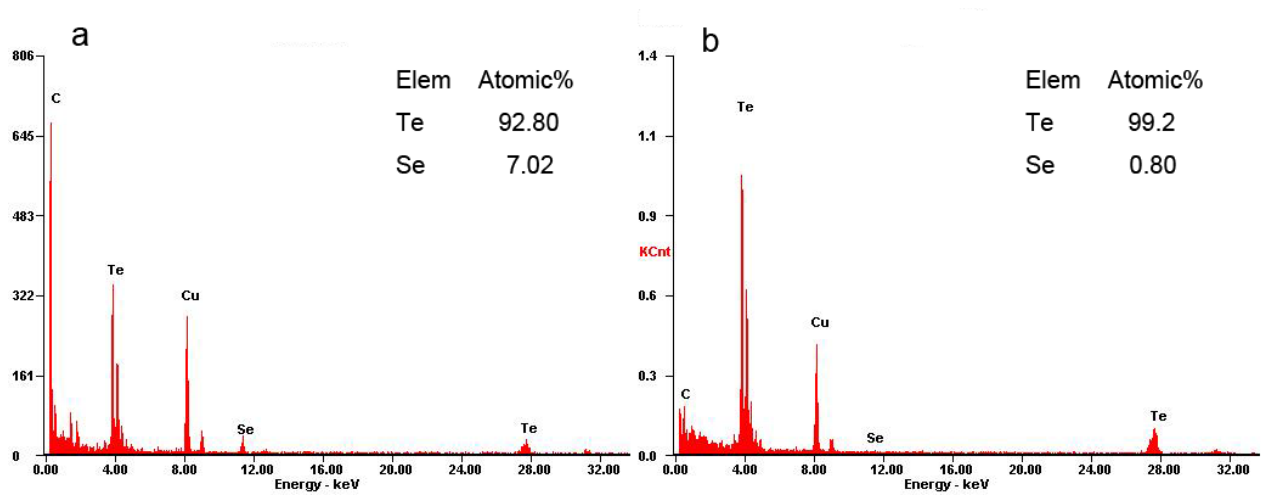

**Fig. S2** The EDS spectra of t-Te/Se ANRs with (a)  $x(\text{Te}:\text{Se})=10:1$  and (b)  $x(\text{Te}:\text{Se})=125:1$  at the growth time of 10 min. The real molar ratio are 13:1 and 124:1 respectively.
