# Supplementary figures and images for: One-step synthesis of high-quality homogenous Te/Se alloy nanorods with various morphologies
Source: Royal Society of Chemistry journal article supplement (doi:10.1039/c4ce02352h), 2015-01-01

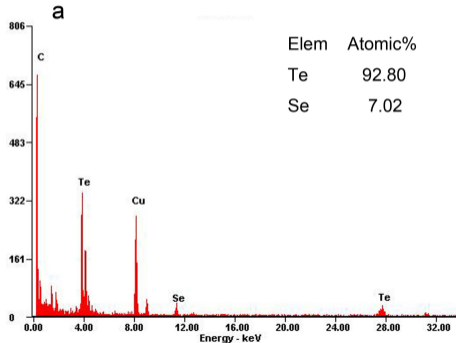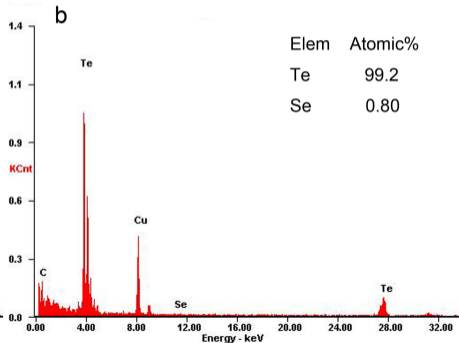

Supplement: c4ce02352h2.pdf [file c4ce02352h2.pdf]

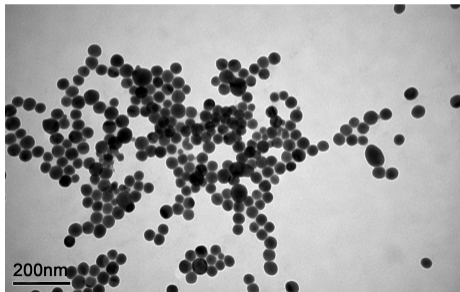

Supplement: c4ce02352h3.pdf [file c4ce02352h3.pdf]
